# Supplementary material
Source: publisher figshare collection journal article supplement (https://acs.figshare.com/ndownloader/files/5104534)
Supplement: Supplementary file 1 [file 5104534]

***Understanding Electrochromic Processes initiated by  
Dithienylcyclopentene Cation Radicals***

Gonzalo Guirado<sup>a</sup>, Christophe Coudret<sup>\*a</sup>, Mohamed Hliwa<sup>a,b</sup> and Jean-Pierre Launay<sup>\*a</sup>

*Nanosciences Group (GNS)*

<sup>a</sup>Centre d'Elaboration de Materiaux et d'Etudes Structurales (*CEMES-CNRS*).

29, rue Jeanne Marvig, BP 94347,

31055 Toulouse Cedex 4, France

Tel : 33(0)5 62 25 78 59, Fax : 33(0)5 62 25 79 99

email: coudret@cemes.fr ; launay@cemes.fr

<sup>a,b</sup> Faculté des Sciences Ben M'Sik Université Hassan II-Mohammédia

BP 7955- Sidi Othman, Casablanca, Maroc

## SUPPORTING INFORMATION

### Contents

|                                                                                                                  |        |
|------------------------------------------------------------------------------------------------------------------|--------|
| Determination of the order of the chemical reaction linked to the electron transfer for compound <b>2o</b> ..... | S2, S3 |
| Cyclic Voltammetry of compound <b>10c</b> .....                                                                  | S4     |
| Determination of the bond length alternation (BLA).....                                                          | S5     |
| Table of Selected distances for neutral and cation-radical compounds.....                                        | S6     |
| Frontier Orbital for neutral and cation-radical compounds... ..                                                  | S7     |
| References.....                                                                                                  | S8     |

## Determination of the order of the chemical reaction linked to the electron transfer

### Compound 2o

A) Solution 1.341 mM of **2o** in ACN,  $E_p$  vs.  $\log v$

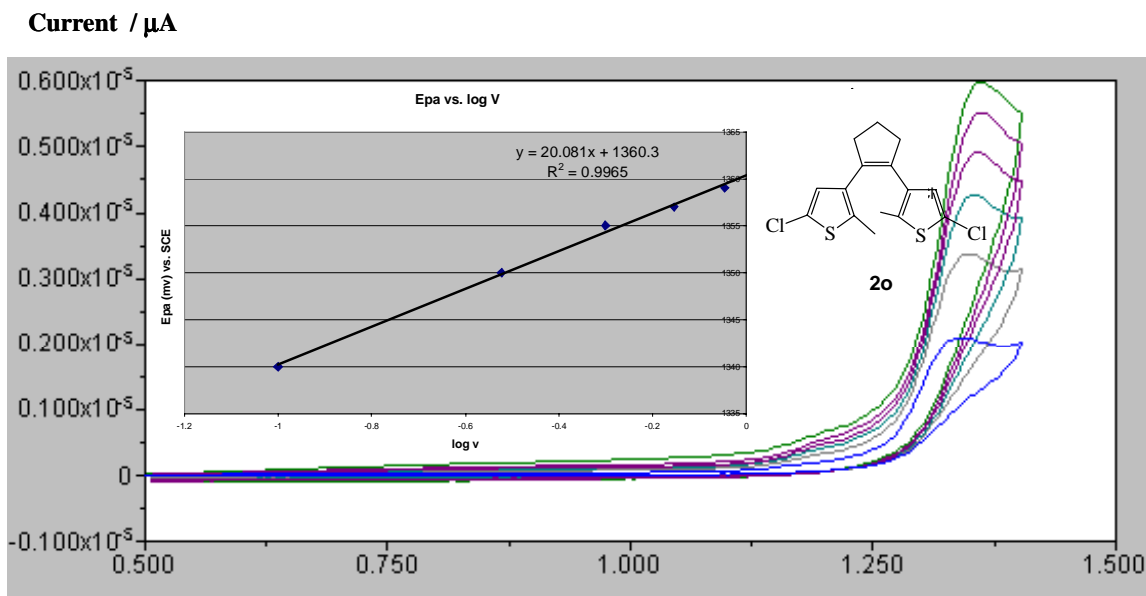

Potential in V vs. SCE

**Figure 1.** Cyclic voltammetry CV of **6o** (1.35mM) in ACN–0.1 M  $n\text{-Bu}_4\text{NPF}_6$  at different scan rates : 0.1, 0.3, 0.5, 0.7, and 1  $\text{V.s}^{-1}$ . Working electrode : Glassy carbon electrode (0.5 mm diameter). Inset : Linear dependence for  $E_p$  value with  $\log v$ .

B) Solution 0.708 mM of **1o** in ACN

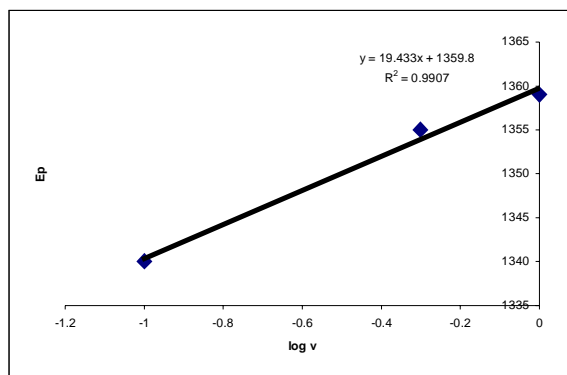

**Figure 2.** Linear dependence for  $E_p$  value with  $\log v$ .

C) Solution 2.820 mM of **1o** in ACN, Ep vs. log  $\nu$

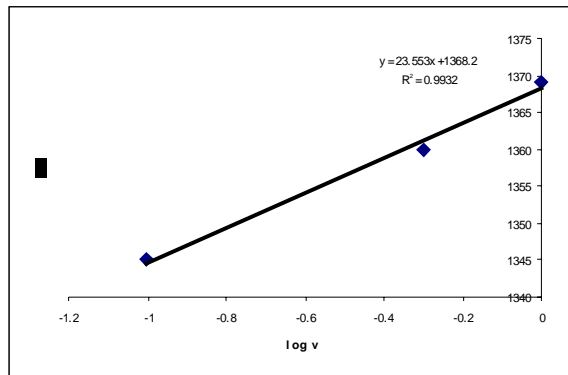

**Figure 3.** Linear dependence for Epa value with log  $\nu$ .

Concentration Dependence Study Ep vs. log  $c$

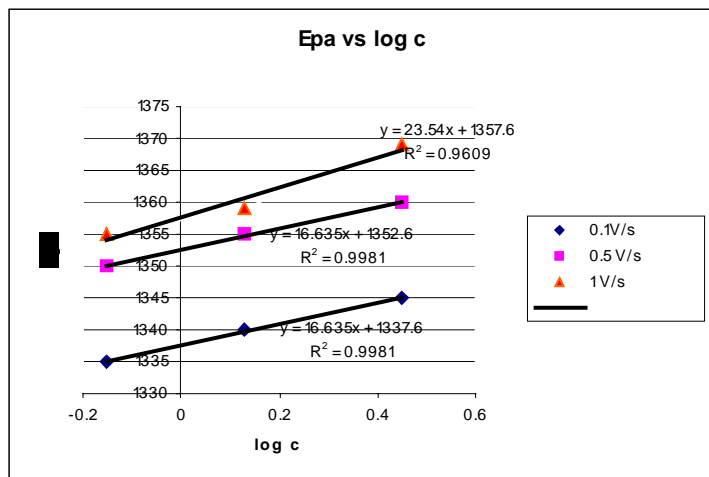

**Figure 4.** Linear dependence for Epa value with log  $c$  at different scan rates.

In ACN, 0.1M *n*-Bu<sub>4</sub>NPF<sub>6</sub> (room temperature) at low scan rates, one chemically irreversible oxidation wave appears at 1.35 V. The shape of the voltammograms (peak width) suggests a fast electron transfer with kinetic control by chemical reaction. In the 0.5-5 mM range, the peak potential is concentration-dependent (19 mV by unit log concentration) and the variation of peak potential with the scan rate is 20 mV by unit log scan rate. We can therefore conclude that the initially produced cation-radical reacts following a second order reaction pathway.<sup>1</sup>

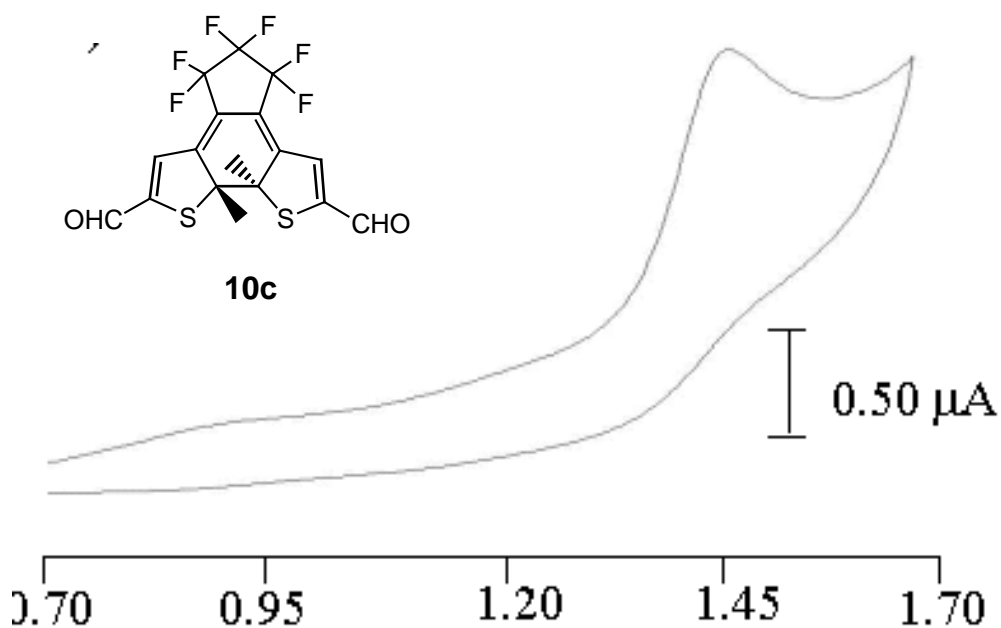

**Figure 5 .** CV of a solution of **10c** (0.80 mM) in in ACN–0.1 M n-Bu<sub>4</sub>NPF<sub>6</sub> at 1.00 V.s<sup>-1</sup>. Working electrode: glassy carbon electrode (0.5 mm diameter).

A one electron irreversible wave ( $E_{pa}$  = 1.42 V vs. SCE at 0.1 V.s<sup>-1</sup>) was found for compound **10c** in all the scan range investigated. The peak width analysis ( $\Delta E_p$  = 75 mV), and the shape of the voltammogram revealed that we are under pure kinetic conditions. A linear dependence between  $E_{pa}$  and  $\log \nu$  was found (slope = 33 mV). The  $\alpha_{app}$  calculated value is 0.69. All this data is in agreement with an EC stepwise mechanism, as it was found for other ring-closed isomers. Controlled-potential electrolysis at 1.8 V vs. SCE was performed. The colored solution was discharged; analysis of the electrolysis sample by thin layer chromatography TLC, CV revealed the presence of the open isomer **10o**.

**Table 1**

Selected distances (Å) of **2c**, **6c** and **11c** cation-radicals optimized at the B3LYP/DZVp level

|                     | <b>2c</b><br>(X=Cl) | <b>2c<sup>+</sup></b><br>(X=Cl) | <b>6c</b><br>(X=S) | <b>6c<sup>+</sup></b><br>(X=S) | <b>11c</b><br>(X=C) | <b>11c<sup>+</sup></b><br>(X=C) |
|---------------------|---------------------|---------------------------------|--------------------|--------------------------------|---------------------|---------------------------------|
| X-C5                | 1.809               | 1.779                           | 1.831              | 1.795                          | 1.480               | 1.504                           |
| C5-C4               | 1.378               | 1.404                           | 1.390              | 1.418                          | 1.394               | 1.409                           |
| C4-C3               | 1.464               | 1.432                           | 1.460              | 1.427                          | 1.449               | 1.428                           |
| C3-Ca               | 1.385               | 1.421                           | 1.387              | 1.426                          | 1.393               | 1.421                           |
| Ca-Ca'              | 1.481               | 1.441                           | 1.479              | 1.440                          | 1.471               | 1.438                           |
| Ca'-C3'             | 1.385               | 1.420                           | 1.387              | 1.425                          | 1.393               | 1.421                           |
| C3'-C4'             | 1.464               | 1.432                           | 1.465              | 1.424                          | 1.450               | 1.428                           |
| C4'-C5'             | 1.379               | 1.404                           | 1.391              | 1.417                          | 1.394               | 1.408                           |
| C5'-X'              | 1.808               | 1.779                           | 1.832              | 1.795                          | 1.481               | 1.503                           |
|                     |                     |                                 |                    |                                |                     |                                 |
| BLA <sub>5-5'</sub> | 0.087               | 0.023                           | 0.079              | 0.009                          | 0.064               | 0.016                           |
|                     |                     |                                 |                    |                                |                     |                                 |

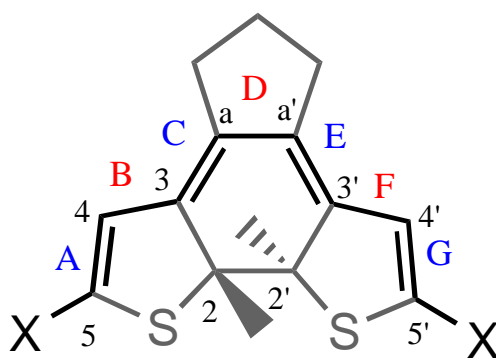

$$\text{BLA}_{5-5'} = \frac{\text{A} + \text{C} + \text{E} + \text{F}}{4} + \frac{\text{B} + \text{D} + \text{E}}{3}$$

**Table 2**

Selected distances (Å) of **2**, **6** and **11** neutral and cation-radicals optimized at the B3LYP/DZVP level

|         | <b>2o</b> | <b>2o<sup>+</sup></b> | $\Delta d_{N-d_{RC}}$ | <b>6o</b> | <b>6o<sup>+</sup></b> | $\Delta d_{N-d_{RC}}$ | <b>11o</b> | <b>11o<sup>+</sup></b> | $\Delta d_{N-d_{RC}}$ |
|---------|-----------|-----------------------|-----------------------|-----------|-----------------------|-----------------------|------------|------------------------|-----------------------|
| C2-C3   | 1.404     | 1.401                 | +0.003                | 1.399     | 1.423                 | +0.024                | 1.411      | 1.442                  | +0.031                |
| C3-Ca   | 1.494     | 1.496                 | -0.001                | 1.498     | 1.484                 | -0.014                | 1.495      | 1.465                  | -0.030                |
| Ca-Ca'  | 1.376     | 1.377                 | -0.001                | 1.380     | 1.385                 | +0.005                | 1.377      | 1.418                  | +0.041                |
| Ca'-C3' | 1.494     | 1.496                 | -0.003                | 1.498     | 1.484                 | -0.014                | 1.495      | 1.465                  | -0.031                |
| C3'-C2' | 1.406     | 1.401                 | +0.004                | 1.399     | 1.423                 | +0.024                | 1.411      | 1.442                  | +0.041                |
|         |           |                       |                       |           |                       |                       |            |                        |                       |
| C2-C2'  | 3.606     | 3.787                 | +0.181                | 3.616     | 3.333                 | -0.283                | 3.669      | 3.311                  | -0.358                |
|         |           |                       |                       |           |                       |                       |            |                        |                       |
|         | <b>2c</b> | <b>2c<sup>+</sup></b> | $\Delta d_{N-d_{RC}}$ | <b>6c</b> | <b>6c<sup>+</sup></b> | $\Delta d_{N-d_{RC}}$ | <b>11c</b> | <b>11c<sup>+</sup></b> | $\Delta d_{N-d_{RC}}$ |
| C2-C3   | 1.562     | 1.555                 | -0.007                | 1.561     | 1.554                 | -0.007                | 1.560      | 1.555                  | -0.005                |
| C3-Ca   | 1.385     | 1.421                 | +0.036                | 1.387     | 1.426                 | +0.039                | 1.393      | 1.421                  | +0.028                |
| Ca-Ca'  | 1.481     | 1.441                 | -0.040                | 1.479     | 1.440                 | -0.040                | 1.471      | 1.438                  | -0.033                |
| Ca'-C3' | 1.385     | 1.421                 | +0.035                | 1.387     | 1.426                 | +0.039                | 1.393      | 1.421                  | +0.028                |
| C3'-C2' | 1.562     | 1.555                 | -0.007                | 1.561     | 1.554                 | -0.007                | 1.560      | 1.555                  | -0.005                |
|         |           |                       |                       |           |                       |                       |            |                        |                       |
| C2-C2'  | 1.557     | 1.564                 | +0.007                | 1.556     | 1.554                 | +0.002                | 1.557      | 1.577                  | +0.020                |

**Table 3**

HOMO ( $\pi$ ) and LUMO ( $\pi^*$ ) frontier molecular orbitals (FMO) plots for the neutral ground state of dithienylcyclopentene derivatives **2**, **6** and **11**. The energy (in eV) and the symmetry (according to the  $C_2$  ponctual group, except for the **2o-syn** and **2c-cis** compound which are of  $C_s$  molecular symmetry) label associated to each FMO are shown at up-right corner of the corresponding image.

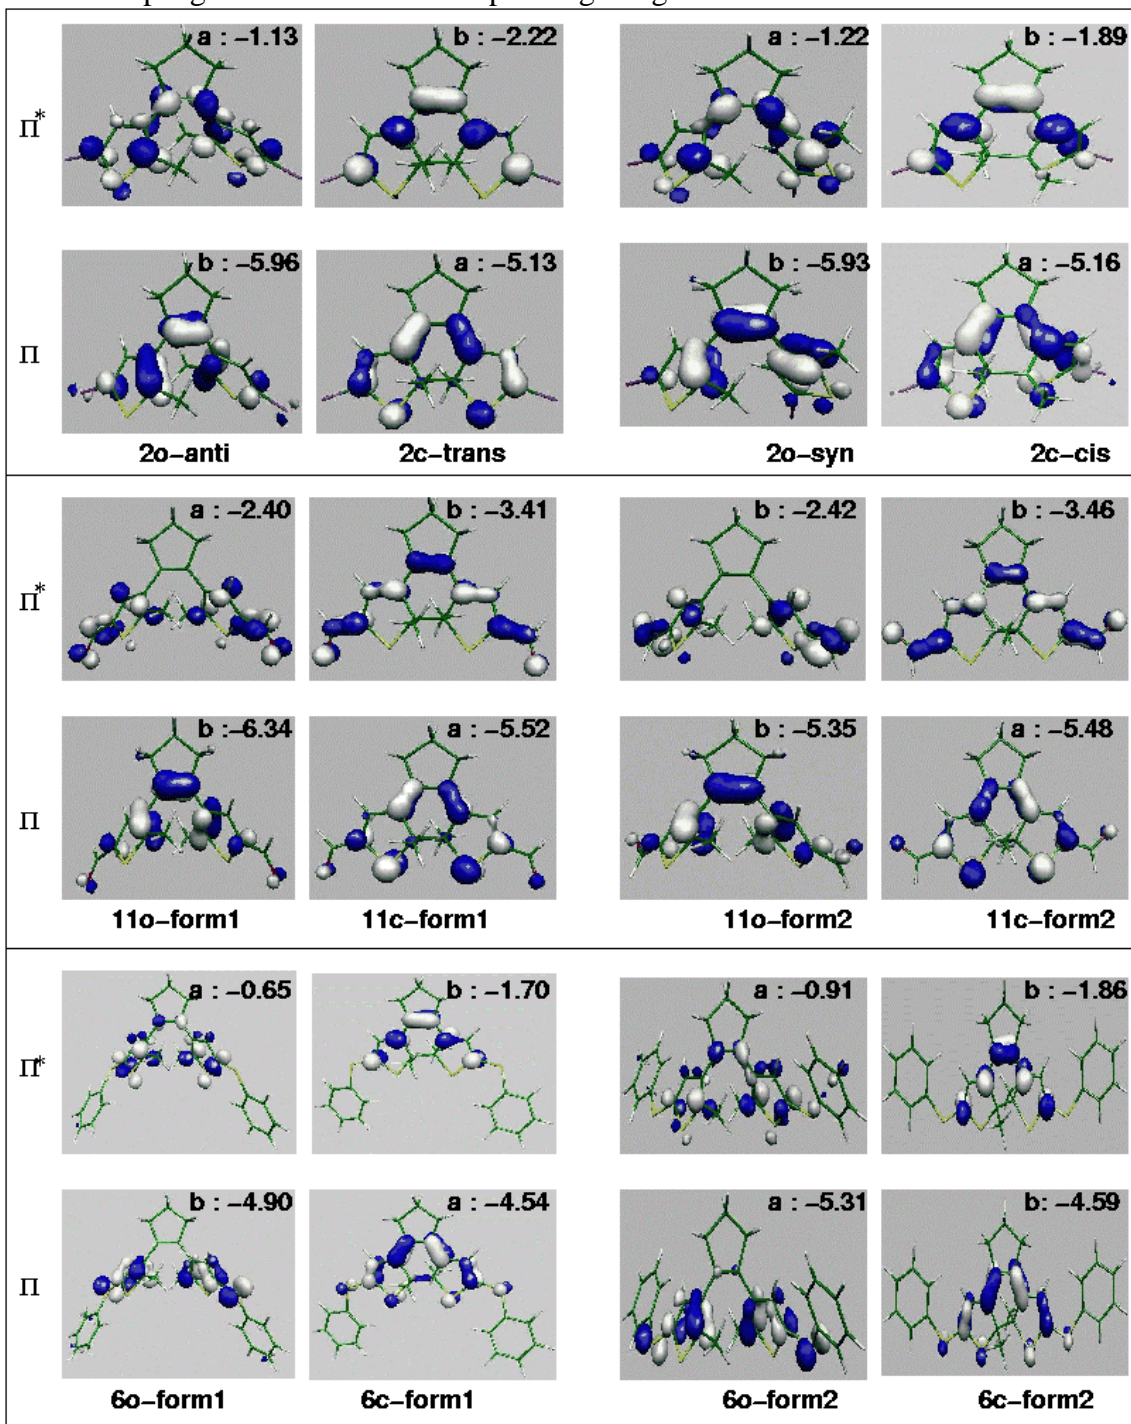

## References:

- [1] L. Nadjo, J.-M. Savéant, *J. Electroanal. Chem.*, 1973, **48**, 113; C. P. Andrieux and J.-M. Savéant, Electrochemical Reactions, in *Investigation of Rates and Mechanism of Reactions, Techniques of Chemistry*, (Ed: C. F. Bernasconi) Wiley, New York, **1986**, vol. 6, ch. 2.1, p. 305.
